# Supplementary material for: A scaffold-free approach to cartilage tissue generation using human embryonic stem cells
Source: PubMed Central journal article supplement (PMC8478992; doi:10.1038/s41598-021-97934-9), 2021-09-28
Supplement: 41598_2021_97934_MOESM1_ESM.pdf [file 41598_2021_97934_MOESM1_ESM.pdf]

## Supplementary data

### **A scaffold-free approach to cartilage tissue generation using human embryonic stem cells**

Lauren A. Griffith<sup>1,2</sup>, Katherine M. Arnold<sup>3</sup>, Bram G. Sengers<sup>2,3</sup>, Rahul S. Tare<sup>1,2,\*</sup> and  
Franchesca D. Houghton<sup>1,2,\*</sup>

<sup>1</sup>Centre for Human Development, Stem Cells & Regeneration, School of Human Development & Health, Faculty of Medicine, University of Southampton, Southampton, UK.

<sup>2</sup>Institute for Life Sciences, University of Southampton, Southampton, UK.

<sup>3</sup>Faculty of Engineering and Physical Sciences, University of Southampton, Southampton, UK.

\*Co-corresponding authors

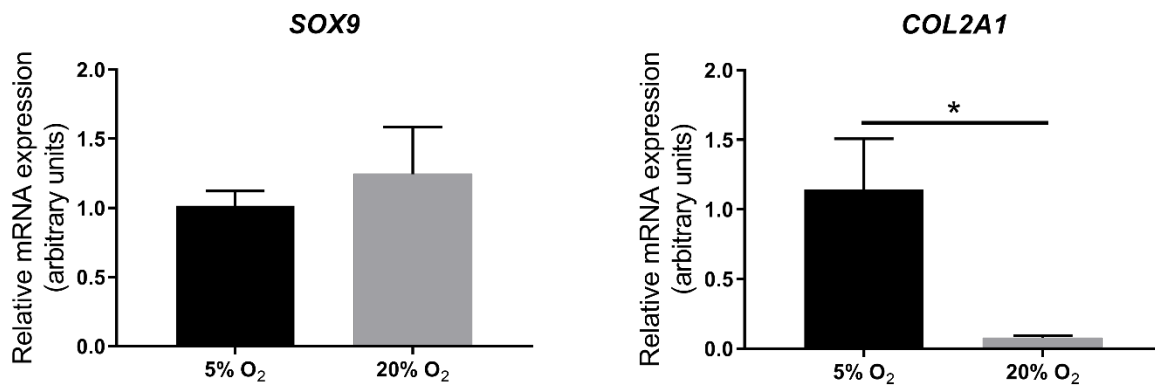

**Fig. S1. Gene expression analysis of chondrocytes generated from hESCs following differentiation at either 5% O<sub>2</sub> or 20% O<sub>2</sub>**

mRNA expression of SOX9 was comparable between hESC-derived chondrocytes generated at 5% O<sub>2</sub> and 20% O<sub>2</sub>. Expression of COL2A1 was significantly higher in hESC-derived chondrocytes generated at 5% O<sub>2</sub> compared to 20% O<sub>2</sub>. Gene expression was normalised to *UBC*. Values represent mean  $\pm$  SEM; n=4 biological replicates; \*p<0.05.

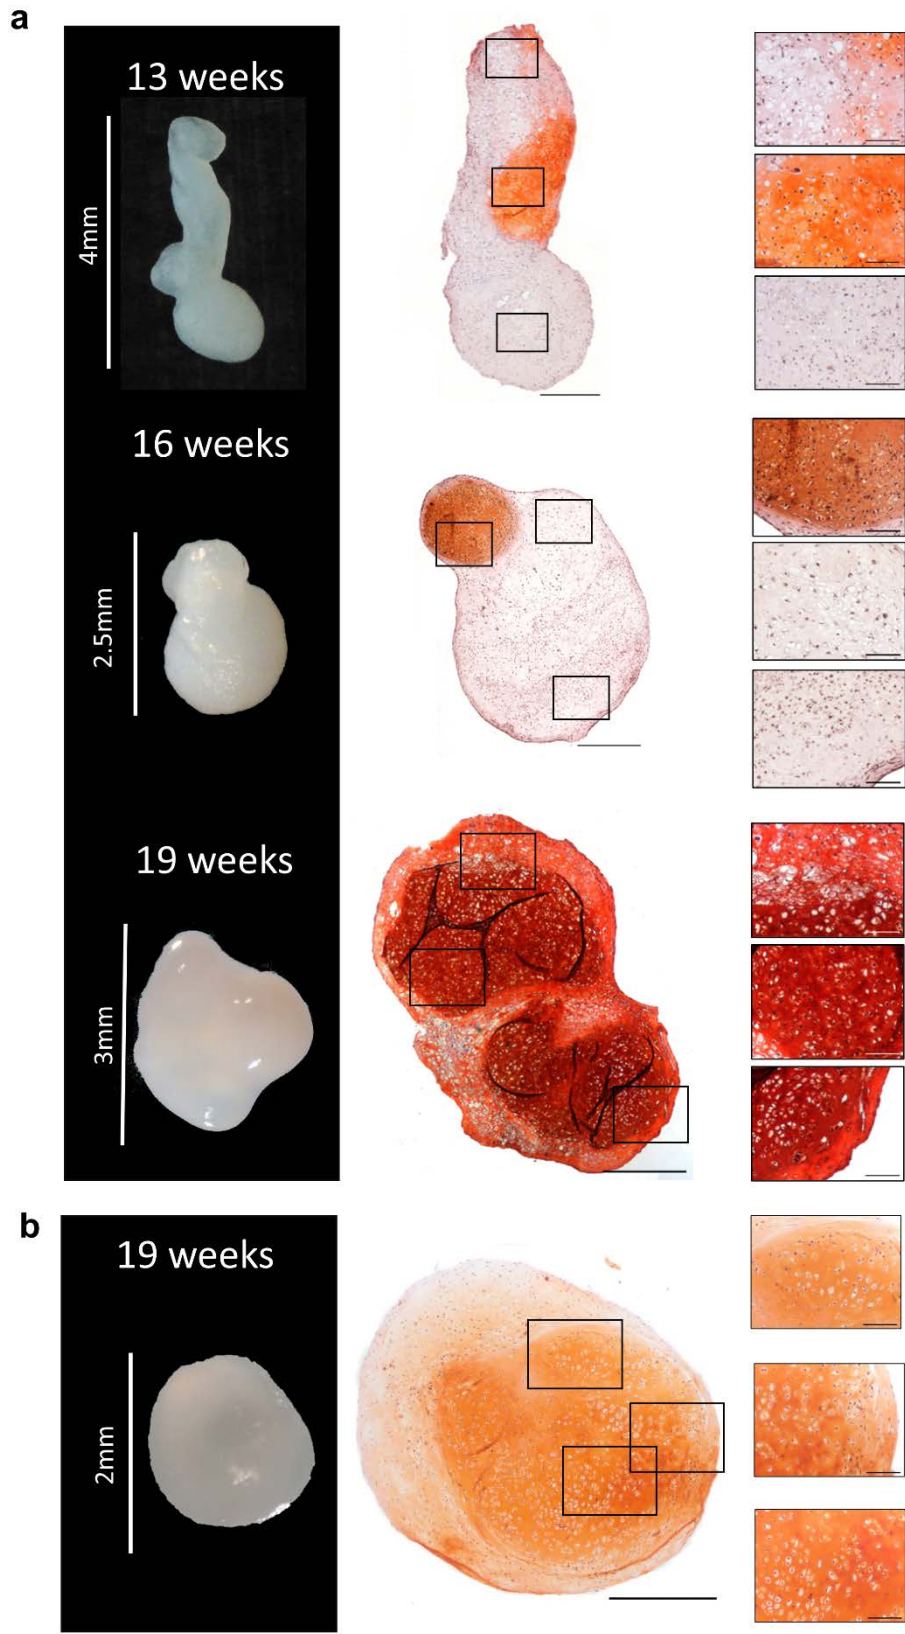

**Fig. S2. Histological characterisation of 13-week, 16-week and 19-week hESC-derived cartilage tissue constructs**

Photographs of 13-week, 16-week and 19-week cartilage tissue constructs of hESC-derived chondrocytes (a). Safranin O stained histological sections of 13-week, 16-week and 19-week hESC-derived cartilage (b). A gradual increase in sGAG expression was observed over time. Scale bars represent 500 $\mu$ m (low magnification) or 100 $\mu$ m (high magnification).

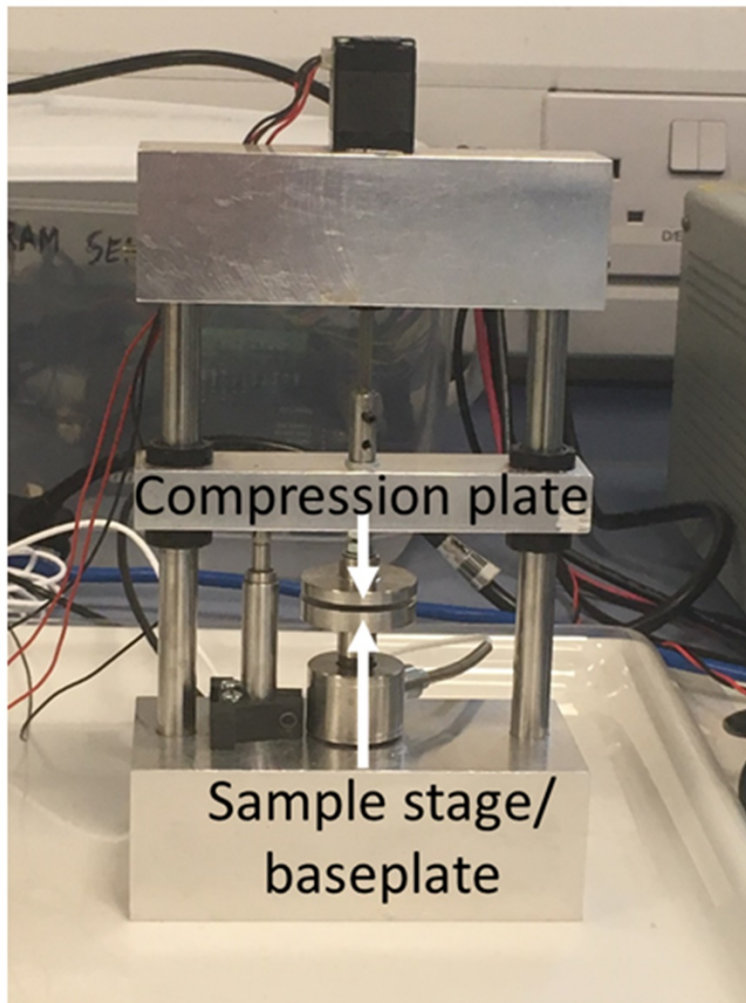

**Fig. S3. Custom-built biomechanical testing rig**

To measure the elastic (Young's) moduli of the cartilage tissue constructs and native articular cartilage, samples were placed on the sample stage/baseplate of the mechanical testing rig and subjected to uniaxial unconfined compression.

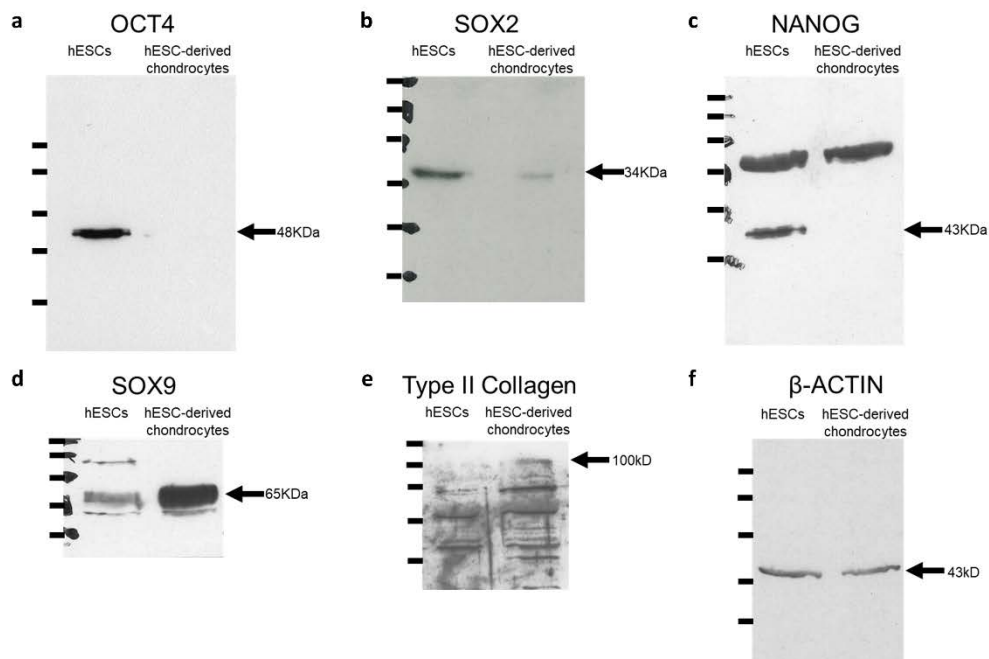

**Fig. S4. Representative full lane Western blots**

Representative Western blots of OCT4 (a), SOX2 (b), NANOG (c), SOX9 (d), Type II Collagen (e) and  $\beta$ -ACTIN (f) expression in hESCs and hESC-derived chondrocytes.
